# Supplementary material
Source: publisher figshare collection journal article supplement (https://geolsoc.figshare.com/ndownloader/files/5424632)
Supplement: Supplementary file 1 [file 5424632]

Mineral		J	± (1s)	% error		Int Age (Ma)	± (2 s)	with ± in J		Plateau Age	± (2s)	with ± in J	MSWD	% 39Ar
WR		0.005625	0.00002	0.36		249.44	1.05	1.96	Plat Segment	248.90	3.20	3.60	0.00	11.33	Probability	Initial Ratio	Initial Ratio Error
222/44	ND-1								IsoPlot PA-->	262.10	1.30	na	1.30	52.60	0.27	na	na
					Decay corrected true ratios				IsoPlot CA-->	na	na	na	na	na	na	na	na
Power	40Ar/39Ar	±	38Ar/39Ar	±	37Ar/39Ar	±	36Ar/39Ar	±	40Ar*/39Ar(K)	±	40Ar*	Cumulative	Age	±	Ca/K	±	Cl/K	±
(%)		(1 s)		(1 s)		(1 s)		(1 s)		(1 s)	(%)	39Ar (%)	(Ma)	(1 s)		(1 s)		(1 s)
3.5	43.592	0.442	0.138	0.007	0.506	0.020	0.092	0.003	16.361	0.804	37.5	2.44	158.83	7.47	0.93	0.06	0.0246	0.00
5.0	27.146	0.118	0.032	0.001	1.618	0.015	0.018	0.001	21.880	0.191	80.5	13.02	209.40	1.73	2.96	0.14	0.0034	0.00
6.5	29.503	0.137	0.022	0.001	2.391	0.023	0.013	0.000	25.854	0.167	87.5	27.70	244.96	1.48	4.38	0.21	0.0014	0.00
8.0	29.372	0.122	0.020	0.001	1.180	0.011	0.006	0.000	27.675	0.148	94.1	40.93	261.01	1.30	2.16	0.10	0.0012	0.00
9.5	28.737	0.152	0.023	0.001	0.675	0.010	0.003	0.000	27.903	0.182	97.1	49.87	263.02	1.59	1.24	0.06	0.0019	0.00
11.0	28.699	0.138	0.031	0.001	0.290	0.006	0.002	0.000	28.018	0.163	97.6	58.65	264.03	1.43	0.53	0.03	0.0038	0.00
12.5	28.653	0.152	0.041	0.002	0.266	0.009	0.002	0.000	27.953	0.197	97.5	65.48	263.46	1.73	0.49	0.03	0.0061	0.00
14.0	28.680	0.202	0.052	0.002	0.272	0.009	0.003	0.001	27.921	0.248	97.3	70.43	263.18	2.17	0.50	0.03	0.0086	0.00
16.0	28.449	0.150	0.077	0.002	0.355	0.009	0.003	0.000	27.501	0.201	96.6	76.13	259.49	1.77	0.65	0.03	0.0143	0.00
18.0	28.505	0.205	0.096	0.002	0.426	0.013	0.004	0.001	27.427	0.283	96.2	80.30	258.84	2.49	0.78	0.04	0.0186	0.00
20.5	28.129	0.167	0.118	0.003	0.517	0.013	0.004	0.001	26.972	0.263	95.9	85.09	254.83	2.31	0.95	0.05	0.0237	0.00
23.0	28.222	0.226	0.122	0.004	0.533	0.019	0.005	0.001	26.829	0.321	95.0	88.67	253.57	2.83		0.06	0.0246	0.00
26.0	28.078	0.188	0.143	0.003	0.610	0.013	0.006	0.001	26.313	0.271	93.7	93.09	249.02	2.40	1.12	0.06	0.0295	0.00
29.0	28.867	0.272	0.144	0.005	0.606	0.023	0.009	0.001	26.288	0.461	91.0	95.43	248.80	4.08	1.11	0.07	0.0296	0.00
45.0	29.262	0.165	0.162	0.003	0.670	0.016	0.010	0.001	26.293	0.277	89.8	100.00	248.84	2.45	1.23	0.06	0.0336	0.00
